# Supplementary material for: Development, implementation and validation of resource-stratified guidelines in low-income and middle-income countries: a scoping review protocol
Source: BMJ Open. 2022 Sep 28;12(9):e059603. doi: 10.1136/bmjopen-2021-059603 (PMC9528583; doi:10.1136/bmjopen-2021-059603)
Supplement: Supplementary data [file bmjopen-2021-059603supp001.pdf]

## Appendices

### Appendix I: Search strategy

| PubMed Search | Query                                                                                                                                                                                                                                                                                                                                                                                                                                                             | Records Retrieved |
|---------------|-------------------------------------------------------------------------------------------------------------------------------------------------------------------------------------------------------------------------------------------------------------------------------------------------------------------------------------------------------------------------------------------------------------------------------------------------------------------|-------------------|
| #1            | (resource and(stratified or limited or limitations or stratification or low or constrain or constrained or under or driven or responsible or scarce or targeted or allocate* or management or specific or modified or adapt or adapted or adaptation*))                                                                                                                                                                                                           | 448,459           |
| #2            | ("DEVELOPING COUNTRIES"[MH] OR "developing nation" OR "developing country" or "developing countries" OR((LMIC OR LMICS OR LICs OR MICs) OR "DEVELOPING COUNTRIES/ECONOMICS"[MH] OR("Low and middle-income country" OR "lower middle income country" or "Low-and middle-income countries" OR "lower middle-income countries") OR "low-income countries" or "low income country" OR "resource-poor setting" or "transitional country" or "transitional countries")) | 175,829           |
| #3            | ("CLINICAL PRACTICE GUIDELINE" OR "EVIDENCE-BASED RECOMMENDATIONS" OR(GUIDELINE OR GUIDELINES) OR(PROTOCOL) OR "EVIDENCE-BASED MEDICINE"[MH] OR "PRACTICE GUIDELINES AS TOPIC"[MH] or "Health Plan Implementation"[MAJR] OR "GUIDELINE ADHERENCE"[MH] OR "PRACTICE GUIDELINES AS TOPIC"[MH])                                                                                                                                                                      | 1,227,106         |
| #4            | #1 AND #2 AND #3                                                                                                                                                                                                                                                                                                                                                                                                                                                  | 2,796             |
| Filters       | Human species; English Language                                                                                                                                                                                                                                                                                                                                                                                                                                   | 2,057             |

| Scopus Search | Query                                                                                                                                                                                                                                | Records Retrieved |
|---------------|--------------------------------------------------------------------------------------------------------------------------------------------------------------------------------------------------------------------------------------|-------------------|
| #1            | TITLE-ABS-KEY ( resource* W/3 ( stratified OR limited OR limitations OR stratification OR low OR constrain* OR under OR driven OR responsible OR scarce OR targeted OR allocate* OR management OR specific OR modified OR adapt* ) ) | 381,768           |
| #2            | TITLE-ABS-KEY (("developing countr*" OR "developing nation" OR ( Imic* OR lics OR mics) OR "Low* and middle-income countr*" OR ( "low-income countr*" OR "resource-poor setting" OR "transitional countr*")))                        | 349,488           |
| #3            | TITLE-ABS-KEY ("Clinical Practice Guideline*" OR "Evidence-Based Recommendation*" OR guideline* OR protocol OR "Evidence-Based Medicine" OR "Health Plan Implementation" OR "Guideline Adherence")                                   | 2,240,877         |
| #4            | #1 AND #2 AND #3                                                                                                                                                                                                                     | 2,168             |
| Filters       | Human species; English Language                                                                                                                                                                                                      | 1,703             |

Search conducted 4 Nov 2021

Appendix II: Data extraction instrument

|       |        |                                          |                                     |                           |                            |             |                |            |                    |                    |                       |                                         |
|-------|--------|------------------------------------------|-------------------------------------|---------------------------|----------------------------|-------------|----------------|------------|--------------------|--------------------|-----------------------|-----------------------------------------|
| Title | Author | Population Characteristics of Developers | Intended Country for Implementation | Rationale for Development | Methodology of Development | Development | Implementation | Validation | Summary of finding | Medical speciality | Practice implications | Recommendations for further development |
|-------|--------|------------------------------------------|-------------------------------------|---------------------------|----------------------------|-------------|----------------|------------|--------------------|--------------------|-----------------------|-----------------------------------------|
